1 **Interleukin-19 alleviates experimental autoimmune encephalomyelitis**  
2 **by attenuating antigen-presenting cell activation**

3

4 Hiroshi Horiuchi<sup>1†</sup>, Bijay Parajuli<sup>1†</sup>, Hiroyasu Komiya<sup>2†</sup>, Yuki Ogawa<sup>2</sup>, Shijie Jin<sup>1</sup>,  
5 Keita Takahashi<sup>2</sup>, Yasu-Taka Azuma<sup>3</sup>, Fumiaki Tanaka<sup>2</sup>, Akio Suzumura<sup>1</sup>,  
6 and Hideyuki Takeuchi<sup>1,2\*</sup>

7

8 <sup>1</sup>Department of Neuroimmunology, Research Institute of Environmental Medicine,  
9 Nagoya University, Furo-cho, Chikusa-ku, Nagoya, 464-8601, Japan.

10 <sup>2</sup>Department of Neurology and Stroke Medicine, Yokohama City University Graduate  
11 School of Medicine, 3-9 Fukuura, Kanazawa-ku, Yokohama 236-0004, Japan.

12 <sup>3</sup>Laboratory of Veterinary Pharmacology, Division of Veterinary Science, Osaka  
13 Prefecture University Graduate School of Life and Environmental Science, Izumisano,  
14 Osaka 598-8531, Japan.

15

16 †These authors contributed equally to this work.

17

18 \*Corresponding Author: Hideyuki Takeuchi, M.D., Ph.D., Department of Neurology and  
19 Stroke Medicine, Yokohama City University Graduate School of Medicine, 3-9 Fukuura,  
20 Kanazawa-ku, Yokohama 236-0004, Japan.

21 Phone: +81-45-787-2725, FAX: +81-45-788-6041, E-mail: [htake@yokohama-cu.ac.jp](mailto:htake@yokohama-cu.ac.jp)

22

23 **Abstract**

24 Interleukin-19 (IL-19) acts as an anti-inflammatory cytokine in various inflammatory  
25 diseases. Multiple sclerosis (MS) is a major neuroinflammatory disease in the central  
26 nervous system, but it remains uncertain how IL-19 contributes to MS pathogenesis. Here,  
27 we demonstrate that IL-19 deficiency aggravates experimental autoimmune  
28 encephalomyelitis (EAE), a mouse model of MS, by promoting IL-17–producing helper  
29 T cell (Th17 cell) infiltration into the central nervous system. In addition, IL-19–deficient  
30 splenic macrophages expressed elevated levels of major histocompatibility complex class  
31 II, co-stimulatory molecules, and Th17 cell differentiation–associated cytokines such as  
32 IL-1 $\beta$ , IL-6, IL-23, TGF- $\beta$ 1, and TNF- $\alpha$ . These observations indicated that IL-19 plays a  
33 critical role in suppression of MS pathogenesis by inhibiting macrophage antigen  
34 presentation, Th17 cell expansion, and subsequent inflammatory responses. Furthermore,  
35 treatment with IL-19 significantly abrogated EAE. Our data suggest that IL-19 could  
36 provide significant therapeutic benefits in patients with MS.

37

## 38 **Introduction**

39 Multiple sclerosis (MS) and experimental autoimmune encephalomyelitis (EAE), a  
40 mouse model of MS, are major autoimmune demyelinating diseases of the central nervous  
41 system (CNS)<sup>1,2</sup>. Various types of immune cells and soluble mediators contribute to the  
42 complex mechanisms underlying the onset and progression of both MS and EAE, and  
43 recent studies have shown that type 1 helper T (Th1) cells and interleukin-17–producing  
44 helper T (Th17) cells play pivotal roles in their pathogenesis<sup>3, 4, 5</sup>. In these diseases,  
45 autoreactive Th17 cells primed in the lymph nodes infiltrate the CNS and activate  
46 microglia/macrophages that induce inflammatory demyelination and subsequent neuronal  
47 damage, resulting in a wide range of clinical features, including sensory and motor  
48 paralysis, blindness, pain, incontinence, and dementia<sup>1,2</sup>.

49 Interleukin-19 (IL-19) is an IL-10 family cytokine that is homologous and highly  
50 similar to IL-20 and IL-24<sup>6, 7</sup>. IL-19 binds to the heterodimeric receptor consisting of IL-  
51 20R $\alpha$  and IL-20R $\beta$ , and its downstream signaling is mediated by STAT3 phosphorylation<sup>8</sup>.  
52 <sup>9</sup>. IL-19 is mainly produced by activated macrophages and microglia<sup>10, 11, 12, 13</sup>. Recent  
53 studies showed that IL-19 exerts anti-inflammatory effects on macrophages by inhibiting  
54 inflammatory cytokine production, downregulating antigen-presenting capacity, and  
55 enhancing M2 phenotype polarization, which promotes type 2 helper T (Th2) cell  
56 differentiation and suppresses Th1 and Th17 cell differentiation<sup>11, 12, 14, 15, 16, 17</sup>. In fact, IL-  
57 19 plays a critical role in development of various autoimmune diseases, including  
58 asthma<sup>18, 19</sup>, psoriasis<sup>20, 21, 22</sup>, inflammatory bowel disease<sup>11, 23</sup>, rheumatoid arthritis<sup>24</sup>, and  
59 Type I diabetes<sup>25</sup>. However, it remains to be elucidated how IL-19 contributes to MS

60 pathogenesis.

61           Here, we examined the pathological role of IL-19 in EAE using IL-19-deficient  
62 (IL-19<sup>-/-</sup>) mice. IL-19 deficiency markedly exacerbated EAE, and treatment with IL-19  
63 effectively suppressed EAE accompanied by inhibiting macrophage antigen presentation  
64 and subsequent expansion of Th17 cells. Our findings suggest that IL-19 may provide  
65 significant therapeutic benefits for treating MS.

66

67 **Results**

68

69 **IL-19 deficiency exacerbates EAE**

70 We generated myelin oligodendrocyte glycoprotein (MOG)-induced EAE in C57BL/6J  
71 wild-type (WT) and IL-19-deficient (IL-19<sup>-/-</sup>) mice. IL-19<sup>-/-</sup> mice exhibited earlier disease  
72 onset and more severe symptoms than WT mice (Fig. 1A). Histological analysis of the  
73 lumbar spinal cords revealed more inflammatory cell infiltration in IL-19<sup>-/-</sup> mice than in  
74 WT mice (Fig. 1B). Flow cytometric analysis also disclosed that IL-19<sup>-/-</sup> EAE mice had  
75 more CNS-infiltrating cells than WT EAE mice (Fig. 1C). We then chronologically  
76 evaluated IL-19 expression levels in the spleen and lumbar spinal cord of WT mice at  
77 pre-immunization, disease onset, and disease peak. Splenic IL-19 mRNA expression was  
78 upregulated at disease onset, but was strongly suppressed at the disease peak (Fig. 1D).  
79 By contrast, upregulation of IL-19 mRNA in the lumbar spinal cord was observed at  
80 disease peak (Fig. 1E). These results suggest that endogenous IL-19 serves as a negative  
81 regulator of EAE pathogenesis at both the induction and effector phases.

82

83 **IL-19 deficiency increases Th17 cell infiltration into the CNS**

84 Because EAE is a Th1 and Th17 cell-mediated autoimmune disease, we next assessed  
85 whether IL-19 deficiency would increase CNS infiltration of Th1 and Th17 cells. Flow  
86 cytometric analysis revealed that at disease peak, IL-19<sup>-/-</sup> mice exhibited more infiltration  
87 of Th17 cells in the spinal cord than WT mice (Fig. 2A, B). By contrast, no difference  
88 was observed in Th1 cell infiltration between IL-19<sup>-/-</sup> and WT mice (Fig. 2C). These

89 results indicate that IL-19 deficiency mediates elevated CNS infiltration by Th17 cells,  
90 but not Th1 cells.

91

## 92 **IL-19 deficiency expands Th17 cell population**

93 To determine whether IL-19 contributes to the expansion of Th17 cells during the  
94 induction phase of EAE, we assessed the antigen-specific expansion of Th17 cells *ex vivo*.  
95 Splenic CD4<sup>+</sup> T cells isolated from WT and IL-19<sup>-/-</sup> mice at MOG-EAE onset were  
96 stimulated with MOG peptide for 3 days *in vitro*. IL-19 deficiency significantly  
97 upregulated *Il17a* mRNA and downregulated *Foxp3* mRNA, but it did not affect the level  
98 of *Ifng* mRNA (Fig. 3A). Flow cytometric analysis also revealed that IL-19 deficiency  
99 expanded the Th17 cell population (Fig. 3B, C). These results indicate that IL-19  
100 deficiency mediates expansion of Th17 cells in the peripheral lymphoid tissues.

101

## 102 **IL-19 deficiency skews cytokine expression profiles toward Th17 cell expansion in** 103 **macrophages**

104 We then examined how IL-19 deficiency expands Th17 cells in the induction phase of  
105 EAE. First, we evaluated the mRNA expression level of IL-19 receptor (heterodimer of  
106 IL-20R $\alpha$  and IL-20R $\beta$  subunits) in the splenic immune cells such as macrophage,  
107 dendritic cell (DC), and CD4<sup>+</sup> helper T cell. We found that both the IL-20R $\alpha$  and IL-20R $\beta$   
108 subunits were more highly expressed in CD11b<sup>+</sup> macrophages and CD4<sup>+</sup> helper T cells  
109 than in CD11c<sup>+</sup> DCs (Fig. S1). These results suggest that IL-19 mainly affects  
110 macrophages and CD4<sup>+</sup> helper T cells.

111           Next, we assessed whether IL-19 directly differentiates naïve CD4<sup>+</sup> T cells into  
112 Th17 cells. Naïve T cells were polarized using immobilized CD3 and CD28 antibodies in  
113 the presence of IL-6 and transforming growth factor  $\beta$ 1 (TGF- $\beta$ 1), with or without IL-19.  
114 Quantitative PCR (qPCR) and flow cytometry revealed that IL-19 did not alter the  
115 differentiation of naïve T cells into Th17 cells (Fig. S2).

116           Because antigen-presenting cells (APCs) are crucial for differentiation of naïve  
117 T cells into effector T cells, we evaluated the expression levels of cytokines required for  
118 Th17 cell expansion in splenic macrophages and DCs. Interestingly, IL-19<sup>-/-</sup> macrophages  
119 exhibited a significant increase in mRNA levels of the genes encoding IL-1 $\beta$ , IL-6, TGF-  
120  $\beta$ , IL-12 p40, IL-23 p19, and tumor necrosis factor  $\alpha$  (TNF- $\alpha$ ), which play pivotal roles  
121 in Th17 cell differentiation and expansion (Fig. 4). Although a previous study showed  
122 that IL-19 increases IL-10 expression <sup>26</sup>, our data showed that IL-19 deficiency did not  
123 alter the *Il10* mRNA level in macrophages (Fig. 4). By contrast, IL-19<sup>-/-</sup> DCs did not  
124 exhibit a significant alteration in the expression levels of these cytokines (Fig. S3). These  
125 findings indicated that IL-19 deficiency skews the cytokine expression profiles toward  
126 Th17 cell differentiation and expansion in macrophages. Conversely, our data suggested  
127 that IL-19 suppresses Th17-skewed condition by activating macrophages.

128

### 129 **IL-19 deficiency promotes MHC class II expression in macrophages**

130 To determine whether IL-19 signaling contributes to antigen presentation by macrophages,  
131 we assessed the expression of major histocompatibility complex (MHC) class II (H2-Ab)  
132 and co-stimulatory molecules (CD80 and CD86) in splenic CD11b<sup>+</sup> macrophages from

133 WT and IL-19<sup>-/-</sup> EAE mice. (Fig. 5A). IL-19 deficiency significantly enhanced expression  
134 of the gene encoding MHC class II, whereas the genes encoding co-stimulatory molecules  
135 CD80 and CD86 were not affected (Fig. 5A). Flow cytometric data corroborated the  
136 enhanced presentation of MHC class II in IL-19<sup>-/-</sup> splenic macrophages (Fig. 5B). These  
137 observations suggested that IL-19 also suppresses the antigen-presenting activity of  
138 macrophages.

139

#### 140 **Treatment with IL-19 abrogates EAE**

141 To determine whether exogenous IL-19 abolishes the effect of IL-19 deficiency in EAE,  
142 we treated IL-19<sup>-/-</sup> EAE mice with recombinant mouse IL-19 protein (20 ng/g of body  
143 weight) by intraperitoneal injection every other day, starting on day 2 post-immunization.  
144 As shown in Figure 6A, administration of IL-19 to IL-19<sup>-/-</sup> mice abolished the  
145 exacerbation of EAE (Fig. 6A, IL-19<sup>-/-</sup> + IL-19). We then investigated the therapeutic  
146 effect of IL-19 on EAE. When we treated WT EAE mice with recombinant mouse IL-19  
147 protein in the same manner, we found that IL-19 treatment almost completely inhibited  
148 EAE (Fig. 6B). These results indicated that IL-19 represents a potential target for MS  
149 therapy.

150



151 **Discussion**

152 In this study, we demonstrated that endogenous IL-19 negatively regulates development  
153 of EAE by inhibiting macrophage activation, and that IL-19 treatment effectively  
154 abrogates EAE. As shown in Fig. 1D and 1E, endogenous *Il19* mRNA expression was  
155 upregulated at EAE onset and downregulated at EAE peak in the spleen, whereas it was  
156 elevated at EAE peak in the CNS. We have previously identified IL-19 as a negative-  
157 feedback regulator to limit proinflammatory response of macrophages and microglia in  
158 autocrine/paracrine manners<sup>11, 12</sup>. From this point of view, these data imply that  
159 endogenous IL-19 increases to suppress inflammation accompanied by  
160 macrophage/microglia activation as disease progresses from the periphery to CNS,  
161 although it is insufficient to halt EAE progression.

162 Th17 cell infiltration in the CNS is considered critical for the development of  
163 EAE<sup>5,27</sup>. Our data revealed that IL-19 deficiency increased CNS infiltration of Th17 cells,  
164 but not Th1 cells (Fig. 2). In addition, IL-19 deficiency enhanced the peripheral expansion  
165 of Th17 cells in the induction phase of EAE (Fig. 3). Conversely, our data indicated that  
166 IL-19 negatively regulates Th17 cell differentiation and expansion, which is critical for  
167 EAE development.

168 However, IL-19 did not directly affect differentiation of Th17 cells from naïve T  
169 cells (Fig. S2). APCs such as macrophages, microglia, and DC are also essential for  
170 effector T cell differentiation and expansion in EAE<sup>28</sup>. Specifically, IL-1 $\beta$ , IL-6, IL-23,  
171 TGF- $\beta$ 1, and TNF- $\alpha$  released by APCs play pivotal roles in Th17 cell differentiation and  
172 expansion<sup>5, 29, 30, 31 32, 33</sup>. In this study, we revealed that IL-19 deficiency significantly

173 upregulated these Th17 cell differentiation–associated cytokines in macrophages, but not  
174 in DCs (Fig. 4 and Fig. S3). These phenomena were correlated with the expression level  
175 of IL-19 receptor (IL-20R $\alpha$  and IL-20R $\beta$  heterodimer), which was highly expressed in  
176 macrophages, but not in DCs or helper T cells (Fig. S1). Thus, IL-19 might negatively  
177 regulate Th17 cell differentiation and expansion through inhibition of cytokine release  
178 from macrophages.

179         Moreover, activated APCs highly express MHC class II and co-stimulatory  
180 molecules (CD80 and CD86) on the cell surface and acquire the ability to prime T cells<sup>34</sup>.  
181 As shown in Fig. 5, IL-19 deficiency further enhanced MHC class II expression in  
182 macrophages. Taken together, our findings suggest that IL-19 suppresses Th17 cell  
183 differentiation and expansion by suppressing cytokine production and antigen  
184 presentation in macrophages. Interestingly, a previous study reported that IL-17A induces  
185 IL-19 production<sup>19</sup>. Thus, IL-19 also might serve as a negative regulator of further Th17  
186 cell polarization.

187         In addition, activated macrophages and microglia directly contribute to  
188 neuroinflammation-induced demyelination by releasing proinflammatory cytokines such  
189 as IL-1 $\beta$ , IL-6, and TNF- $\alpha$ <sup>28, 35, 36, 37</sup>. In our study, IL-19 deficiency increased the levels  
190 of these proinflammatory cytokines in macrophages and exacerbated EAE until the late  
191 phase of the disease. We previously revealed that IL-19 secreted from activated  
192 macrophages and microglia suppressed their proinflammatory responses in an  
193 autocrine/paracrine manner<sup>11, 12</sup>. Therefore, IL-19 might suppress development of EAE  
194 by dual inhibition of both autoreactive Th17 cell expansion and macrophage/microglia-

195 mediated CNS neuroinflammation.

196           Although the IL-19 signaling pathway has not been fully elucidated, IL-19  
197 mediates its downstream signaling at least by STAT3 activation<sup>8, 9, 12, 38</sup>. However, it  
198 remains controversial whether STAT3 activation is beneficial or harmful with regard to  
199 autoimmune-mediated neuroinflammation. Previous studies also reported that STAT3  
200 activation in myeloid cells (including macrophages and microglia) exacerbates EAE<sup>39, 40</sup>.  
201 By contrast, STAT3 ablation worsens neuroinflammation in mice with spinal cord injury<sup>41</sup>,  
202 and STAT3 activation alleviates cuprizone-induced CNS demyelination<sup>42</sup>. This  
203 discordancy may depend on spatiotemporally specific activation of STAT3<sup>43</sup>. Indeed, in  
204 contrast to macrophages, IL-19 deficiency did not affect activation of DCs. Recent  
205 clinical trials of JAK/STAT inhibitors for autoimmune diseases have revealed a  
206 complicated signal network of cytokine/STAT axes in multiple cell types<sup>44</sup>. Further  
207 studies are needed to elucidate the precise IL-19 signaling pathway in each cell type.

208           In summary, we revealed that IL-19 deficiency exacerbated EAE by upregulating  
209 Th17 cell differentiation–associated cytokines and enhancing antigen presentation in  
210 macrophages, followed by Th17 cell expansion and infiltration in the CNS. We also  
211 demonstrated that IL-19 administration potently prevented development of EAE.  
212 Therefore, enhancement of IL-19 signaling represents a promising therapeutic strategy  
213 against MS and other Th17-mediated autoimmune diseases.

214

215 **Material and Methods**

216

217 **Reagents**

218 MOG peptide 35–55 (MOG<sub>35–55</sub>; MEVGWYRSPFSRVVHLYRNGK) was synthesized  
219 and purified by Operon Biotechnologies (Tokyo, Japan). Incomplete Freund's adjuvant  
220 was obtained from Sigma-Aldrich (St. Louis, MO, USA). Heat-killed *Mycobacterium*  
221 *tuberculosis* H37Ra was obtained from Difco (Detroit, MI, USA), and pertussis toxin was  
222 obtained from List Biological Laboratories (Campbell, CA, USA). Recombinant mouse  
223 IL-6, IL-19, and TGF- $\beta$ 1 were obtained from R&D Systems (Minneapolis, MN, USA).

224

225 **Animals**

226 All animal experiments were conducted under protocols approved by the Animal  
227 Experiment Committee of Nagoya University (approved numbers: 15017 and 15018) and  
228 Yokohama City University (approved number: F-A-19-036). C57BL/6J (B6) mice were  
229 purchased from Japan SLC (Hamamatsu, Japan). IL-19<sup>-/-</sup> mice (B6 background)<sup>11,12</sup> were  
230 obtained from Regeneron Pharmaceuticals (Tarrytown, NY, USA).

231

232 **EAE induction and treatment studies**

233 MOG-EAE was induced as previously described<sup>45,46,47</sup>. In brief, 8-week-old female mice  
234 were immunized subcutaneously at the base of the tail with 0.2 ml of emulsion containing  
235 200  $\mu$ g MOG<sub>35–55</sub> in saline, combined with an equal volume of complete Freund's  
236 adjuvant containing 300 mg heat-killed *Mycobacterium tuberculosis* H37Ra. The mice

237 were intraperitoneally injected with 200 ng pertussis toxin on days 0 and 2 post-  
238 immunization. To investigate the effect of IL-19, EAE mice were treated with mouse  
239 recombinant IL-19 protein (20 ng/g of body weight) by intraperitoneal injection every  
240 other day starting on day 2 post-immunization, according to a modification of a  
241 previously reported method<sup>48,49</sup>. The mice were assessed daily for clinical signs of EAE,  
242 according to the following grading system: 0, normal; 1 - limp tail or mild hind limb  
243 weakness; 2 - moderate hind limb weakness or mild ataxia; 3 - moderate to severe hind  
244 limb weakness; 4 - severe hind limb weakness, mild forelimb weakness or moderate  
245 ataxia; 5 - paraplegia with moderate forelimb weakness; and 6 - paraplegia with severe  
246 forelimb weakness, severe ataxia, or moribundity.

247

#### 248 **Isolation of cells from spleen and lumbar spinal cord**

249 Mononuclear cells were collected from the spleen and lumbar spinal cord as described  
250 previously<sup>45, 46, 47</sup>. CD4<sup>+</sup>, CD11b<sup>+</sup>, and CD11c<sup>+</sup> cells were isolated using the MACS  
251 system (Miltenyi Biotec, Bergisch Gladbach, Germany). Helper T cell differentiation was  
252 induced as described previously<sup>5, 32, 47</sup>. For flow cytometric analysis, cells were stained  
253 with PerCP/Cy5.5 or BV421-conjugated anti-mouse CD4 rat monoclonal antibody  
254 (RM4-5; BD Biosciences, Franklin Lakes, NJ, USA). The cells were then fixed and  
255 permeabilized with Cytotfix/Cytoperm reagent (BD Biosciences) and stained with PE-  
256 conjugated anti-mouse IFN- $\gamma$  rat monoclonal antibody (XMG1.2; BD Biosciences) and  
257 APC- or PE-conjugated anti-mouse IL-17A rat monoclonal antibody (TC11-18H10; BD  
258 Biosciences). The samples were analyzed using a FACS Aria III system (BD Biosciences)

259 and the FlowJo software (FlowJo, Ashland, OR, USA).

260

### 261 **Histological analysis**

262 Histological analysis was performed as previously described<sup>45</sup>. Mice with peak EAE  
263 were anesthetized and perfused transcardially with 4% paraformaldehyde in 0.1 M PBS.  
264 Lumbosacral spinal cords were immediately removed, postfixed in 4% paraformaldehyde,  
265 and embedded in paraffin. Eight-micron-thick sections were stained with hematoxylin  
266 and eosin. Stained sections were analyzed on a NanoZoomer 2.0-RS slide scanner  
267 (Hamamatsu Photonics, Hamamatsu, Japan).

268

### 269 **RNA extraction and reverse-transcription polymerase chain reactions (RT-PCRs)**

270 We evaluated the expression levels of proinflammatory factors in the lumbar spinal cords  
271 and spleens by qPCR as described previously<sup>12, 45</sup>. In brief, lumbar spinal cords and  
272 spleens were collected from EAE mice at pre-immunization, EAE onset, and EAE peak  
273 (approximately on days 0, 10, 16 post-immunization, respectively). Total RNA was  
274 isolated with an RNeasy Mini Kit (Qiagen, Valencia, CA, USA) and reverse transcribed  
275 with SuperScript III (Life Technologies, Carlsbad, CA, USA). Expression levels of  
276 mRNAs were evaluated by qPCR using SYBR Select Master Mix (Applied Biosystems,  
277 Foster City, CA, USA) on a Rotor-Gene Q (Qiagen) or LightCycler 96 (Roche). Mouse  
278 gene-specific primers were obtained from Life Technologies (Table 1). Gene-expression  
279 values were determined using the  $\Delta\Delta C_T$  method. Levels of mRNAs of interest were  
280 standardized to the geometric mean of the level of hypoxanthine

281 phosphoribosyltransferase 1 (*Hprt1*). Assays were carried out in three independent trials.

282

### 283 **Statistical analysis**

284 Statistical significance was analyzed using Student's t-test or one-way analysis of

285 variance (ANOVA) followed by post hoc Tukey's test in GraphPad Prism version 8

286 (GraphPad Software, La Jolla, CA, USA).

287

### 288 **Data availability**

289 The datasets generated and analyzed during the study are available from the

290 corresponding author upon reasonable request.

291

292

293 **References**

- 294 1. Hemmer B, Archelos JJ, Hartung HP. New concepts in the immunopathogenesis  
295 of multiple sclerosis. *Nat Rev Neurosci* **3**, 291-301 (2002).  
296
- 297 2. Filippi M, *et al.* Multiple sclerosis. *Nat Rev Dis Primers* **4**, 43 (2018).  
298
- 299 3. Waisman A, Hauptmann J, Regen T. The role of IL-17 in CNS diseases. *Acta*  
300 *Neuropathol* **129**, 625-637 (2015).  
301
- 302 4. Takeuchi H. Midkine and multiple sclerosis. *Brit J Pharmacol* **171**, 931-935  
303 (2014).  
304
- 305 5. Bettelli E, *et al.* Reciprocal developmental pathways for the generation of  
306 pathogenic effector TH17 and regulatory T cells. *Nature* **441**, 235-238 (2006).  
307
- 308 6. Gallagher G, *et al.* Cloning, expression and initial characterisation of interleukin-  
309 19 (IL-19), a novel homologue of human interleukin-10 (IL-10). *Genes and*  
310 *Immunity* **1**, 442-450 (2000).  
311
- 312 7. Gallagher G, *et al.* Human interleukin-19 and its receptor: a potential role in the  
313 induction of Th2 responses. *Int Immunopharmacol* **4**, 615-626 (2004).  
314
- 315 8. Nagalakshmi ML, Murphy E, McClanahan T, de Waal Malefyt R. Expression  
316 patterns of IL-10 ligand and receptor gene families provide leads for biological  
317 characterization. *Int Immunopharmacol* **4**, 577-592 (2004).  
318
- 319 9. Dumoutier L, Leemans C, Lejeune D, Kotenko SV, Renauld JC. Cutting edge:  
320 STAT activation by IL-19, IL-20 and mda-7 through IL-20 receptor complexes of  
321 two types. *Journal of Immunology* **167**, 3545-3549 (2001).  
322
- 323 10. Wolk K, *et al.* Maturing dendritic cells are an important source of IL-29 and IL-  
324 20 that may cooperatively increase the innate immunity of keratinocytes. *J Leukoc*  
325 *Biol* **83**, 1181-1193 (2008).  
326
- 327 11. Azuma YT, *et al.* Interleukin-19 protects mice from innate-mediated colonic  
328 inflammation. *Inflamm Bowel Dis* **16**, 1017-1028 (2010).  
329
- 330 12. Horiuchi H, *et al.* Interleukin-19 acts as a negative autocrine regulator of activated  
331 microglia. *PLoS One* **10**, e0118640 (2015).  
332
- 333 13. Cooley ID, Chauhan VS, Donneyz MA, Marriott I. Astrocytes produce IL-19 in  
334 response to bacterial challenge and are sensitive to the immunosuppressive effects  
335 of this IL-10 family member. *Glia* **62**, 818-828 (2014).  
336



- 337 14. Myles IA, *et al.* Signaling via the IL-20 receptor inhibits cutaneous production of  
338 IL-1 $\beta$  and IL-17A to promote infection with methicillin-resistant *Staphylococcus*  
339 *aureus*. *Nat Immunol* **14**, 804-811 (2013).  
340
- 341 15. Ellison S, *et al.* IL-19 reduces ligation-mediated neointimal hyperplasia by  
342 reducing vascular smooth muscle cell activation. *Am J Pathol* **184**, 2134-2143  
343 (2014).  
344
- 345 16. Wahl C, *et al.* IL-20 receptor 2 signaling down-regulates antigen-specific T cell  
346 responses. *J Immunol* **182**, 802-810 (2009).  
347
- 348 17. Oral HB, *et al.* Regulation of T cells and cytokines by the interleukin-10 (IL-10)-  
349 family cytokines IL-19, IL-20, IL-22, IL-24 and IL-26. *Eur J Immunol* **36**, 380-  
350 388 (2006).  
351
- 352 18. Liao SC, *et al.* IL-19 induced Th2 cytokines and was up-regulated in asthma  
353 patients. *J Immunol* **173**, 6712-6718 (2004).  
354
- 355 19. Huang F, *et al.* Potentiation of IL-19 expression in airway epithelia by IL-17A and  
356 IL-4/IL-13: Important implications in asthma. *Journal of Allergy and Clinical*  
357 *Immunology* **121**, 1415-1421000 (2008).  
358
- 359 20. Kunz S, *et al.* Interleukin (IL)-19, IL-20 and IL-24 are produced by and act on  
360 keratinocytes and are distinct from classical ILs. *Exp Dermatol* **15**, 991-1004  
361 (2006).  
362
- 363 21. Ghoreschi K, *et al.* Interleukin-4 therapy of psoriasis induces Th2 responses and  
364 improves human autoimmune disease. *Nat Med* **9**, 40-46 (2003).  
365
- 366 22. Chan JR, *et al.* IL-23 stimulates epidermal hyperplasia via TNF and IL-20R2-  
367 dependent mechanisms with implications for psoriasis pathogenesis. *J Exp Med*  
368 **203**, 2577-2587 (2006).  
369
- 370 23. Fonseca-Camarillo G, Furuzawa-Carballeda J, Granados J, Yamamoto-Furusho  
371 JK. Expression of interleukin (IL)-19 and IL-24 in inflammatory bowel disease  
372 patients: a cross-sectional study. *Clin Exp Immunol* **177**, 64-75 (2014).  
373
- 374 24. Sakurai N, *et al.* Expression of IL-19 and its receptors in RA: potential role for  
375 synovial hyperplasia formation. *Rheumatology (Oxford)* **47**, 815-820 (2008).  
376
- 377 25. Barrett JC, *et al.* Genome-wide association study and meta-analysis find that over  
378 40 loci affect risk of type 1 diabetes. *Nat Genet* **41**, 703-707 (2009).  
379
- 380 26. Jordan WJ, *et al.* Human IL-19 regulates immunity through auto-induction of IL-  
381 19 and production of IL-10. *Eur J Immunol* **35**, 1576-1582 (2005).

- 382  
383 27. Xu Y, *et al.* Irgm1 is required for the inflammatory function of M1 macrophage  
384 in early experimental autoimmune encephalomyelitis. *J Leukoc Biol* **101**, 507-517  
385 (2017).  
386  
387 28. Yoshida Y, *et al.* The transcription factor IRF8 activates integrin-mediated TGF-  
388  $\beta$  signaling and promotes neuroinflammation. *Immunity* **40**, 187-198 (2014).  
389  
390 29. Ghoreschi K, *et al.* Generation of pathogenic T(H)17 cells in the absence of TGF-  
391 beta signalling. *Nature* **467**, 967-971 (2010).  
392  
393 30. Ivanov, II, *et al.* The orphan nuclear receptor ROR $\gamma$  directs the  
394 differentiation program of proinflammatory IL-17<sup>+</sup> T helper cells. *Cell* **126**, 1121-  
395 1133 (2006).  
396  
397 31. Mangan PR, *et al.* Transforming growth factor-beta induces development of the  
398 T(H)17 lineage. *Nature* **441**, 231-234 (2006).  
399  
400 32. Chung Y, *et al.* Critical regulation of early Th17 cell differentiation by interleukin-  
401 1 signaling. *Immunity* **30**, 576-587 (2009).  
402  
403 33. Mufazalov IA, *et al.* IL-1 signaling is critical for expansion but not generation of  
404 autoreactive GM-CSF<sup>+</sup> Th17 cells. *The EMBO journal* **36**, 102-115 (2017).  
405  
406 34. Blum JS, Wearsch PA, Cresswell P. Pathways of antigen processing. *Annu Rev*  
407 *Immunol* **31**, 443-473 (2013).  
408  
409 35. Becher B, Spath S, Goverman J. Cytokine networks in neuroinflammation. *Nat*  
410 *Rev Immunol* **17**, 49-59 (2017).  
411  
412 36. Deng X, Sriram S. Role of microglia in multiple sclerosis. *Curr Neurol Neurosci*  
413 *Rep* **5**, 239-244 (2005).  
414  
415 37. Luo C, *et al.* The role of microglia in multiple sclerosis. *Neuropsychiatr Dis Treat*  
416 **13**, 1661-1667 (2017).  
417  
418 38. Uto-Konomi A, *et al.* Dysregulation of suppressor of cytokine signaling 3 in  
419 keratinocytes causes skin inflammation mediated by interleukin-20 receptor-  
420 related cytokines. *PLoS One* **7**, e40343 (2012).  
421  
422 39. Qin H, *et al.* Signal transducer and activator of transcription-3/suppressor of  
423 cytokine signaling-3 (STAT3/SOCS3) axis in myeloid cells regulates  
424 neuroinflammation. *Proc Natl Acad Sci U S A* **109**, 5004-5009 (2012).  
425  
426 40. Lu HC, *et al.* STAT3 signaling in myeloid cells promotes pathogenic myelin-

- 427 specific T cell differentiation and autoimmune demyelination. *Proc Natl Acad Sci*  
428 *U S A* **117**, 5430-5441 (2020).  
429
- 430 41. Okada S, *et al.* Conditional ablation of Stat3 or Socs3 discloses a dual role for  
431 reactive astrocytes after spinal cord injury. *Nat Med* **12**, 829-834 (2006).  
432
- 433 42. Emery B, *et al.* Suppressor of cytokine signaling 3 limits protection of leukemia  
434 inhibitory factor receptor signaling against central demyelination. *Proc Natl Acad*  
435 *Sci U S A* **103**, 7859-7864 (2006).  
436
- 437 43. Liu Y, Gibson SA, Benveniste EN, Qin H. Opportunities for Translation from the  
438 Bench: Therapeutic Intervention of the JAK/STAT Pathway in  
439 Neuroinflammatory Diseases. *Crit Rev Immunol* **35**, 505-527 (2015).  
440
- 441 44. Schwartz DM, Kanno Y, Villarino A, Ward M, Gadina M, O'Shea JJ. JAK  
442 inhibition as a therapeutic strategy for immune and inflammatory diseases. *Nat*  
443 *Rev Drug Discov* **16**, 843-862 (2017).  
444
- 445 45. Wang J, *et al.* Inhibition of midkine alleviates experimental autoimmune  
446 encephalomyelitis through the expansion of regulatory T cell population. *Proc*  
447 *Natl Acad Sci U S A* **105**, 3915-3920 (2008).  
448
- 449 46. Shimojima C, *et al.* Conditioned Medium from the Stem Cells of Human  
450 Exfoliated Deciduous Teeth Ameliorates Experimental Autoimmune  
451 Encephalomyelitis. *J Immunol* **196**, 4164-4171 (2016).  
452
- 453 47. Zhou Y, *et al.* IL-9 promotes Th17 cell migration into the central nervous system  
454 via CC chemokine ligand-20 produced by astrocytes. *J Immunol* **186**, 4415-4421  
455 (2011).  
456
- 457 48. Richards J, Gabunia K, Kelemen SE, Kako F, Choi ET, Autieri MV. Interleukin-  
458 19 increases angiogenesis in ischemic hind limbs by direct effects on both  
459 endothelial cells and macrophage polarization. *J Mol Cell Cardiol* **79**, 21-31  
460 (2015).  
461
- 462 49. Guo J, Wang H, Li L, Yuan Y, Shi X, Hou S. Treatment with IL-19 improves  
463 locomotor functional recovery after contusion trauma to the spinal cord. *Br J*  
464 *Pharmacol* **175**, 2611-2621 (2018).  
465  
466  
467

468 **Acknowledgements**

469 This work was supported by grants-in-aid for Scientific Research from the Ministry of  
470 Education, Culture, Sports, Science and Technology of Japan (H.T.); grants from the  
471 Ministry of Health, Labour and Welfare of Japan (A.S., H.T.); the Program for Promotion  
472 of Fundamental Studies in Health Sciences of the National Institute of Biomedical  
473 Innovation (NIBIO) of Japan (A.S.); and a grant from the Naito Foundation (H.T.).

474

475 **Author contributions**

476 H.H., B.P., A.S., and H.T. designed the research; H.H., B.P., H.K., Y.O., J.S., K.T., Y.A.,  
477 and H.T. performed the research; H.H., B.P., H.K., F.T., A.S., and H.T. analyzed the data;  
478 and H.H., B.P., and H.T. wrote the paper.

479

480 **Competing interests**

481 The authors declare no competing interests.

482

483 **Figure Legends**

484

485 **Figure 1. IL-19 deficiency aggravates EAE.**

486 (A) EAE clinical scores for WT (black) and IL-19<sup>-/-</sup> (red) mice. Data represent means ±  
487 SD (n = 10). \*\*\*,  $p < 0.0001$ . (B) Micrographs of hematoxylin/eosin staining of L5  
488 lumbar spinal cords at the peak EAE of WT and IL-19<sup>-/-</sup> mice. The right panels show  
489 enlargements of the boxed areas in the left panels. Scale bars: 500 μm (left), 100 μm  
490 (right). (C) Flow cytometric analysis of cell infiltration in the CNS at the peak EAE (n =  
491 5). Data represent means ± SD. \*\*,  $p < 0.01$ . (D and E) chronological qPCR data for IL-  
492 19 mRNA expression level in the spleen (D) and the lumbar spinal cord (E) of WT EAE  
493 mice (n = 5). Pre, pre-immunization; onset, EAE onset; peak, EAE peak. Data represent  
494 means ± SD. \*\*,  $p < 0.01$ .

495

496 **Figure 2. IL-19 deficiency increases CNS infiltration of Th17 cells, but not Th1 cells.**

497 (A) Representative flow-cytometric data for IL-17<sup>-</sup> and IFN-γ-producing CD4<sup>+</sup> T cells  
498 in the CNS at the peak EAE. (B) Percentage of IL-17<sup>-</sup>producing CD4<sup>+</sup> T cells. (C)  
499 Percentage of IFN-γ-producing CD4<sup>+</sup> T cells. Data represent means ± SD (n = 3). \*,  $p <$   
500 0.05.

501

502 **Figure 3. IL-19 deficiency expands the Th17 cell population.**

503 (A) qPCR data for levels of mRNAs encoding IL-17A, IFN-γ, and FoxP3 in splenic CD4<sup>+</sup>  
504 T cells. (B) Representative flow cytometric data for IL-17<sup>-</sup>producing CD4<sup>+</sup> T cells in the

505 spleens of EAE mice. (C) Percentage of IL-17–producing CD4<sup>+</sup> T cells in the spleens of  
506 EAE mice. Data represent means  $\pm$  SD (n = 3). \*,  $p < 0.05$ .

507

508 **Figure 4. IL-19 deficiency upregulates Th17 cell differentiation–associated cytokines**  
509 **in macrophages.**

510 (A) qPCR data for mRNAs encoding IL-1 $\beta$ , IL-6, TGF- $\beta$ 1, IL-12 p40, IL-23 p19, IL-10,  
511 and TNF- $\alpha$  in splenic macrophages of EAE mice. Assessments were performed 7 days  
512 after immunization. Data represent means  $\pm$  SD. \*\*\*,  $p < 0.0001$  (n = 6).

513

514 **Figure 5. IL-19 deficiency enhances antigen-presenting activity in macrophages.**

515 (A) qPCR data for mRNAs encoding MHC class II (H2-Ab), CD80, and CD86 in the  
516 splenic macrophages on day 7 after immunization. Data represent means  $\pm$  SD. \*,  $p <$   
517 0.05 (n = 6). (B) Representative flow cytometric data for MHC class II (H2-Ab)  
518 presentation in splenic macrophages.

519

520 **Figure 6. Treatment with recombinant IL-19 alleviates EAE.**

521 (A) EAE clinical score. WT + PBS (black): WT EAE mice treated with PBS; IL-19<sup>-/-</sup> +  
522 PBS (red): IL-19<sup>-/-</sup> EAE mice treated with PBS; IL-19<sup>-/-</sup> + IL-19 (blue): IL-19<sup>-/-</sup> EAE mice  
523 treated with IL-19. (B) EAE clinical score. WT + PBS (black), WT EAE mice treated  
524 with PBS; WT + IL-19 (blue), WT EAE mice treated with IL-19. Data represent means  $\pm$   
525 SD. \*,  $p < 0.05$  (n = 5).

526

527 **Table 1. Primers for qPCR**

| Gene                           | Primer sequence             |
|--------------------------------|-----------------------------|
| mouse <i>Il19</i> sense        | CAACCTGCTGACATTCTACAGAG     |
| mouse <i>Il19</i> antisense    | CCTGACATCGCTCCAGAGATTT      |
| mouse <i>Il17a</i> sense       | TCATCTGTGTCTCTGATGCTGTTG    |
| mouse <i>Il17a</i> antisense   | TCGCTGCCTTCACTGT            |
| mouse <i>Ifng</i> sense        | TGGCATAGATGTGGAAGAAAAGAG    |
| mouse <i>Ifng</i> antisense    | TGCAGGATTTTCATGTCACCAT      |
| mouse <i>Foxp3</i> sense       | TTCATGCATCAGCTCTCCAC        |
| mouse <i>Foxp3</i> antisense   | CTGGACACCCATTCCAGACT        |
| mouse <i>Il1b</i> sense        | GAAATGCCACCTTTTGACAGTG      |
| mouse <i>Il1b</i> antisense    | TGGATGCTCTCATCAGGACAG       |
| mouse <i>Il6</i> sense         | TCTATAACCACTTCACAAGTCGGA    |
| mouse <i>Il6</i> antisense     | GAATTGCCATTGCACAACCTCTTT    |
| mouse <i>Tgfb1</i> sense       | CGAAGCGGACTACTATGCTAAAGA    |
| mouse <i>Tgfb1</i> antisense   | GTTTTCTCATAGATGGCGTTGTTG    |
| mouse <i>Il10</i> sense        | GAGAAGCATGGCCCAGAAATC       |
| mouse <i>Il10</i> antisense    | CGCATCCTGAGGGTCTTCA         |
| mouse <i>Il12p40</i> sense     | GGTGCAAAGAAACATGGACTTG      |
| mouse <i>Il12p40</i> antisense | CACATGTCACTGCCCGAGAGT       |
| mouse <i>Il23p19</i> sense     | GCACCAGCGGGACATATGA         |
| mouse <i>Il23p19</i> antisense | CCTTGTGGGTCACAACCATCT       |
| mouse <i>Tnfa</i> sense        | GACCCTCACACTCAGATCATCTTCT   |
| mouse <i>Tnfa</i> antisense    | CCACTTGGTGGTTTGCTACGA       |
| mouse <i>Il20ra</i> sense      | GGAAACTCAAGTCAGCCCAC        |
| mouse <i>Il20ra</i> antisense  | AGATGGACTTCTCGCCAGTT        |
| mouse <i>Il20rb</i> sense      | CCGAAATGCAACTGTCCTCAC       |
| mouse <i>Il20rb</i> antisense  | AATAACCAGATGCAGCCCATGT      |
| mouse <i>Rorgt</i> sense       | GCGACTGGAGGACCTTCTAC        |
| mouse <i>Rorgt</i> antisense   | TCCCACATTGACTTCCTCTG        |
| mouse <i>H2ab1</i> sense       | AGACGCCGAGTACTGGAACAGCCAGC  |
| mouse <i>H2ab1</i> sense       | CAGAGTGTTGTGGTGGTTGAGGGCCTC |
| mouse <i>Cd80</i> sense        | CATCAAAGCTGACTTCTCTACCC     |
| mouse <i>Cd80</i> antisense    | GGGTTTTTCCCAGGTGAAGT        |
| mouse <i>Cd86</i> sense        | TCAGTGATCGCCAACCTCAG        |
| mouse <i>Cd86</i> sense        | GAAACTCTTGAGTGAAATTGAGAGG   |
| mouse <i>Hprt1</i> sense       | CAGTCAACGGGGACATAAA         |
| mouse <i>Hprt1</i> antisense   | GGGGCTGTACTGCTTAACCAG       |

528

529

530 **Supplementary Figure Legends**

531

532 **Figure S1. IL-19 receptor heterodimer subunits IL-20R $\alpha$  and IL-20R $\beta$  are more**  
533 **highly expressed in macrophage and helper T cells than in dendritic cells.**

534 (A) qPCR for mRNA encoding IL-20R $\alpha$  in CD11b<sup>+</sup> macrophages, CD11c<sup>+</sup> dendritic cells,  
535 and CD4<sup>+</sup> helper T cells in the spleen. (B) qPCR data for mRNA encoding IL-20R $\beta$  in  
536 CD11b<sup>+</sup> macrophages, CD11c<sup>+</sup> dendritic cells, and CD4<sup>+</sup> T cells in the spleen. Data are  
537 represented as means  $\pm$  SD. \*,  $p < 0.05$  (n = 3).

538

539 **Figure S2. IL-19 does not alter differentiation of naïve T cells into Th17 cells.**

540 (A) qPCR data for mRNAs encoding IL-17A and ROR $\gamma$ t. (B) Representative flow  
541 cytometric data for IL-17A expression. (C) Quantitative analysis of (B). Data are  
542 represented as means  $\pm$  SD. \*,  $p < 0.05$  (n = 5).

543

544 **Figure S3. IL-19 deficiency does not alter the expression levels of Th17 cell**  
545 **differentiation-associated cytokines in dendritic cells.**

546 qPCR data for mRNAs encoding IL-1 $\beta$ , IL-6, TGF- $\beta$ 1, IL-12 p40, IL-23 p19, IL-10, and  
547 TNF- $\alpha$  expression in splenic dendritic cells of EAE mice. Assessments were performed 7  
548 days after immunization. Data are represented as means  $\pm$  SD (n = 6).

549



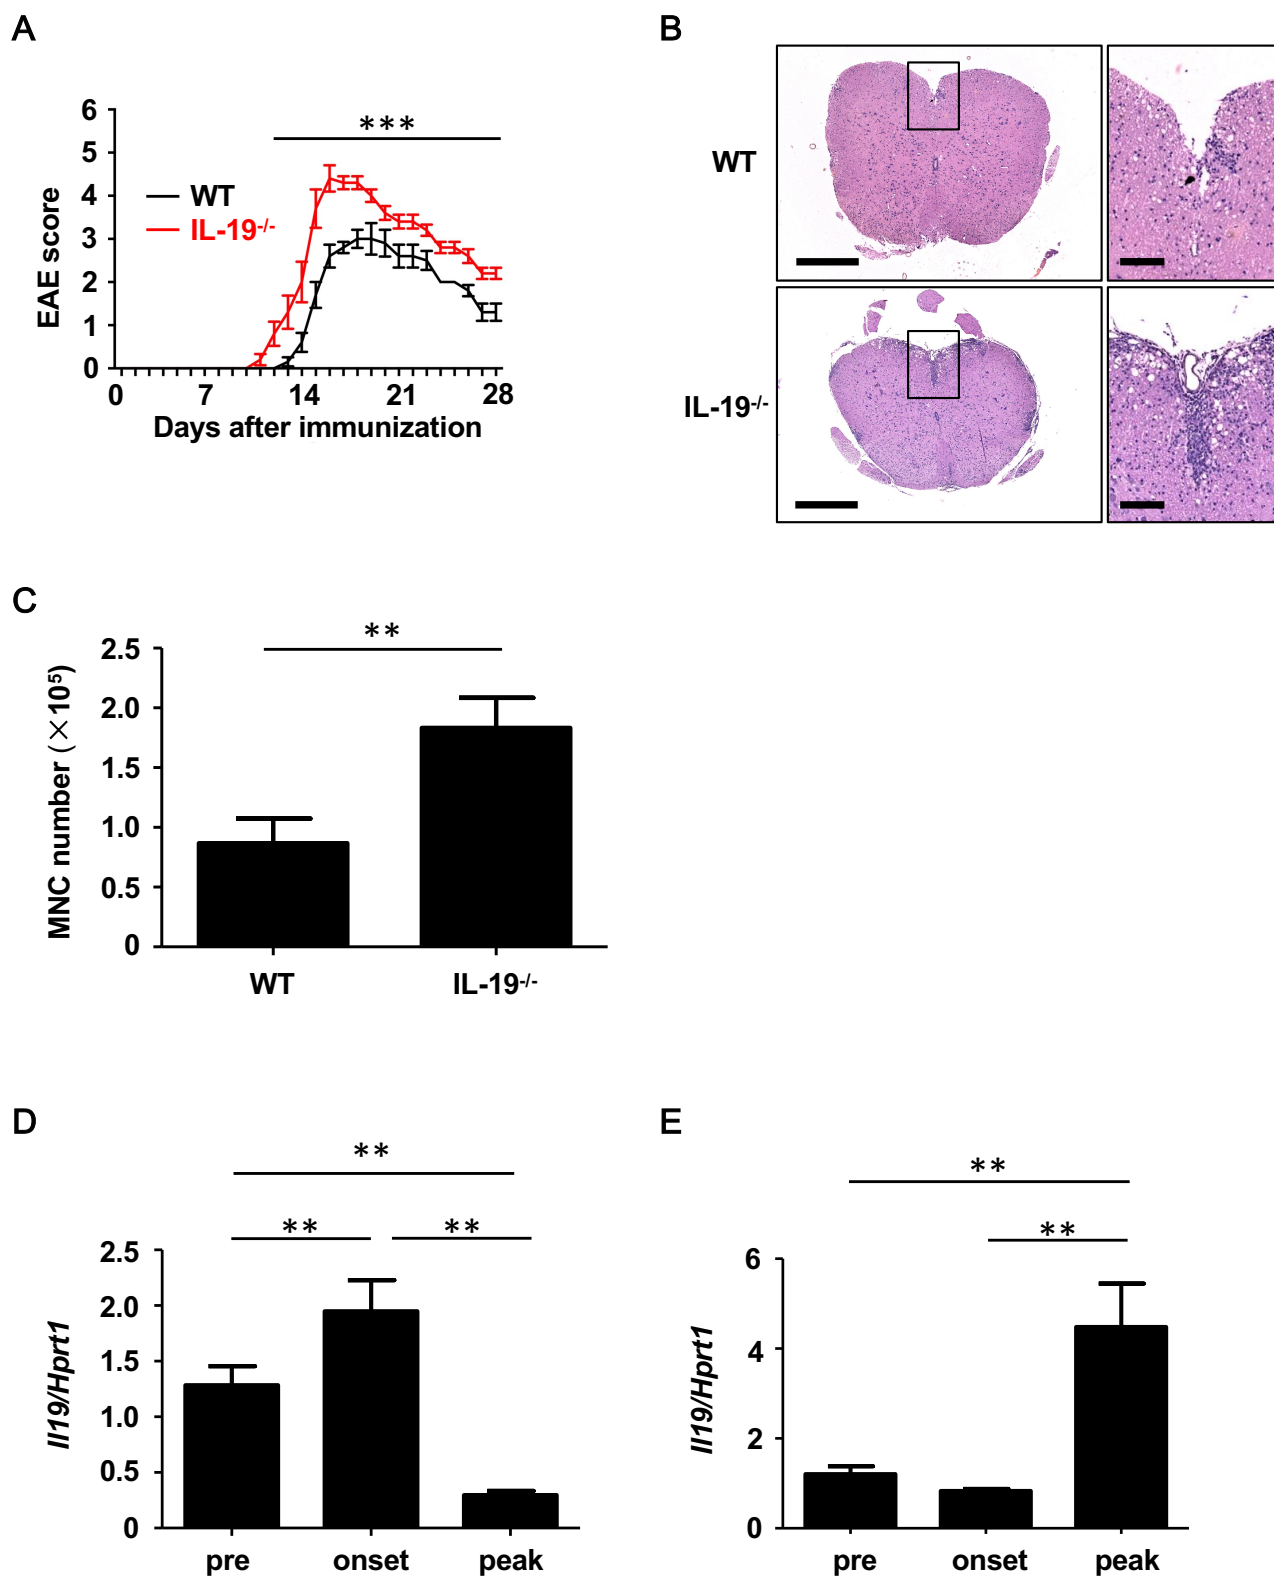

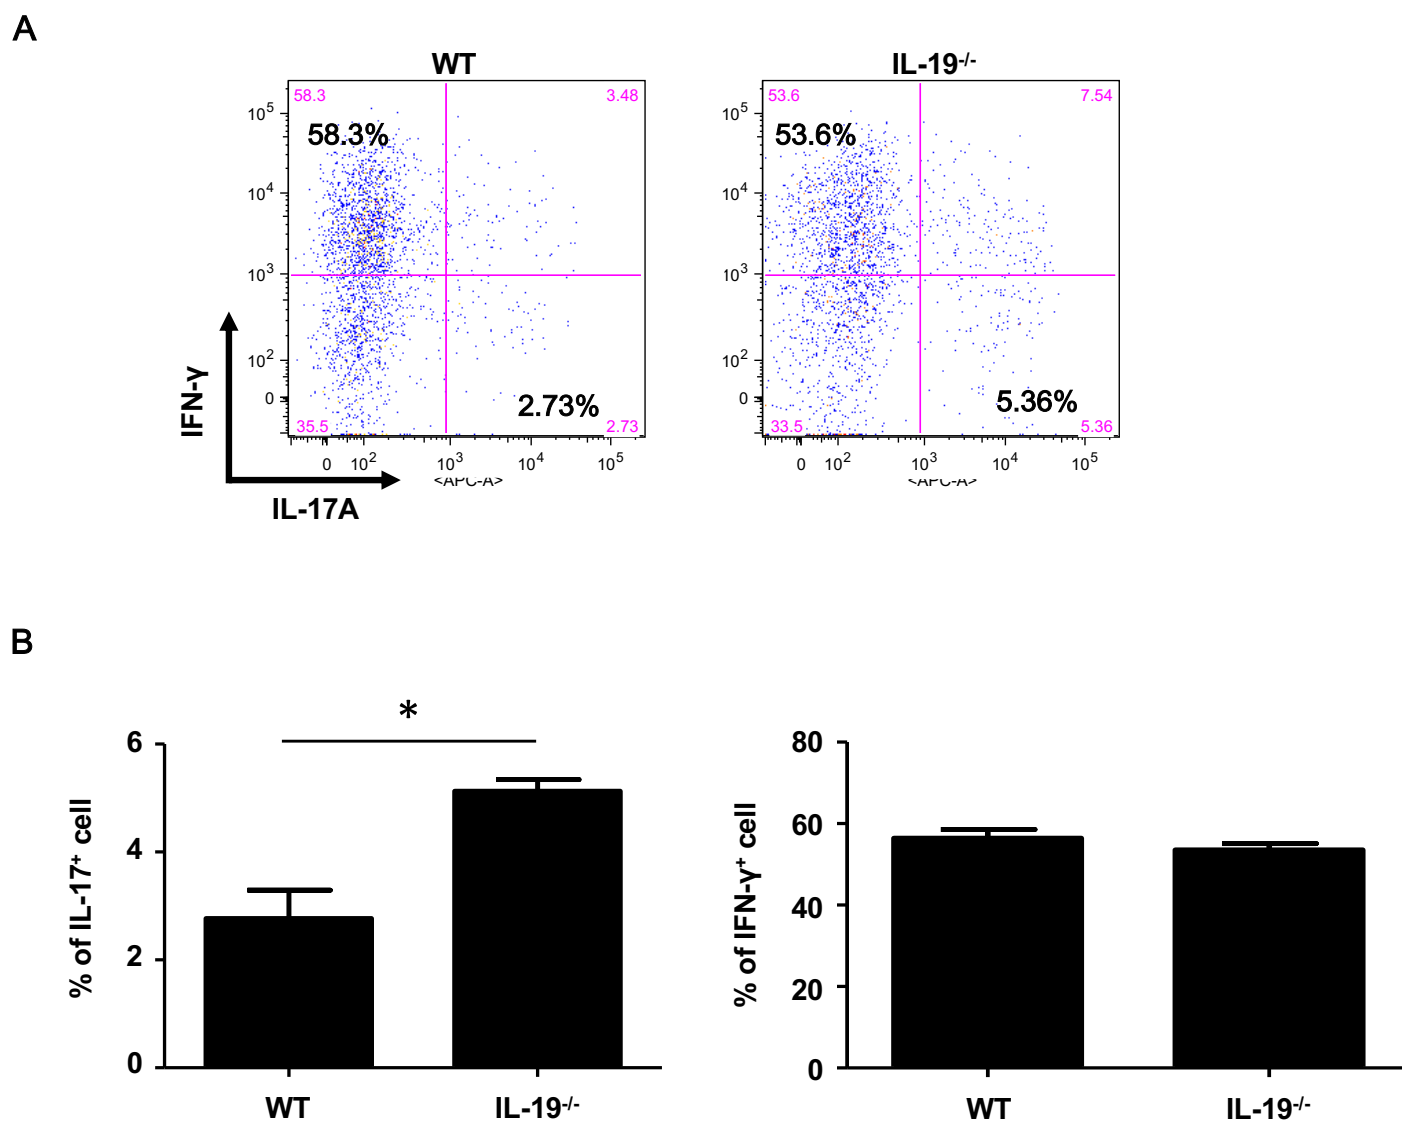

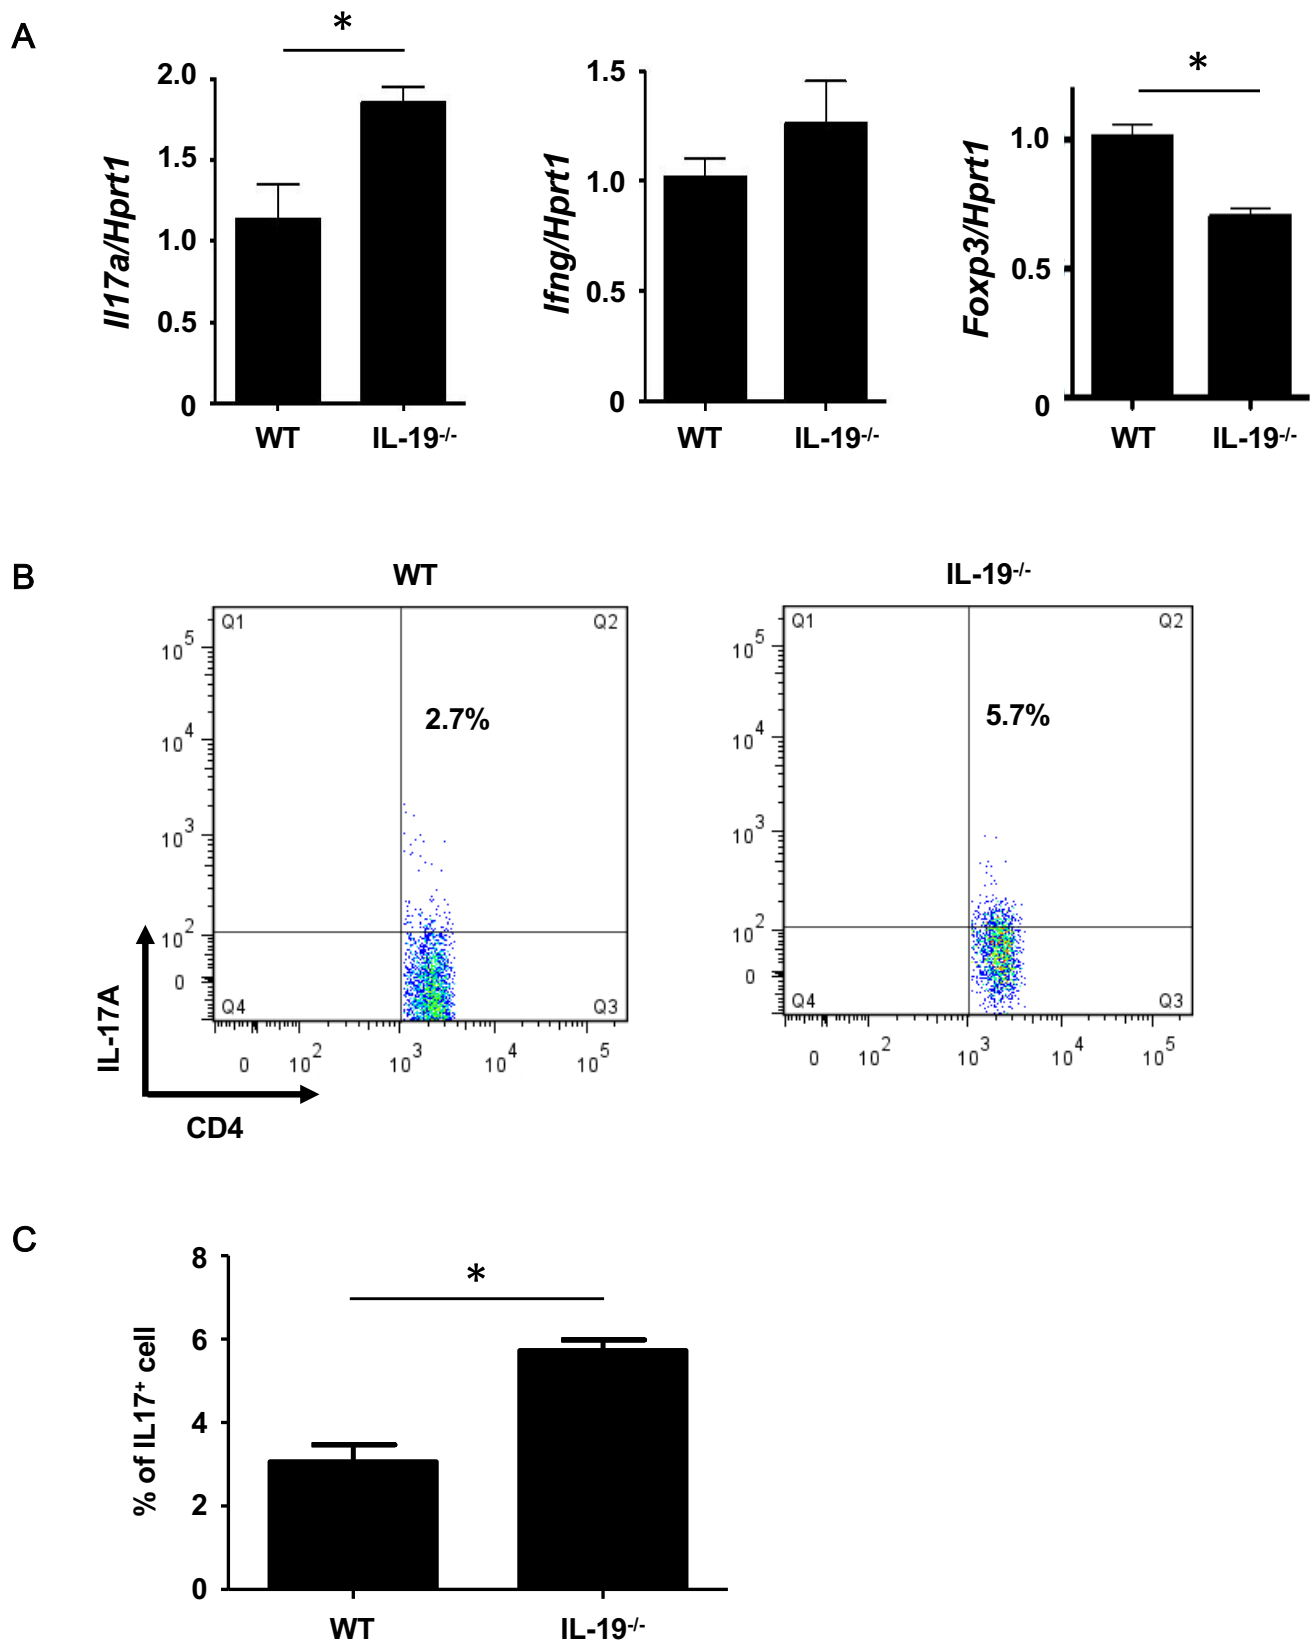

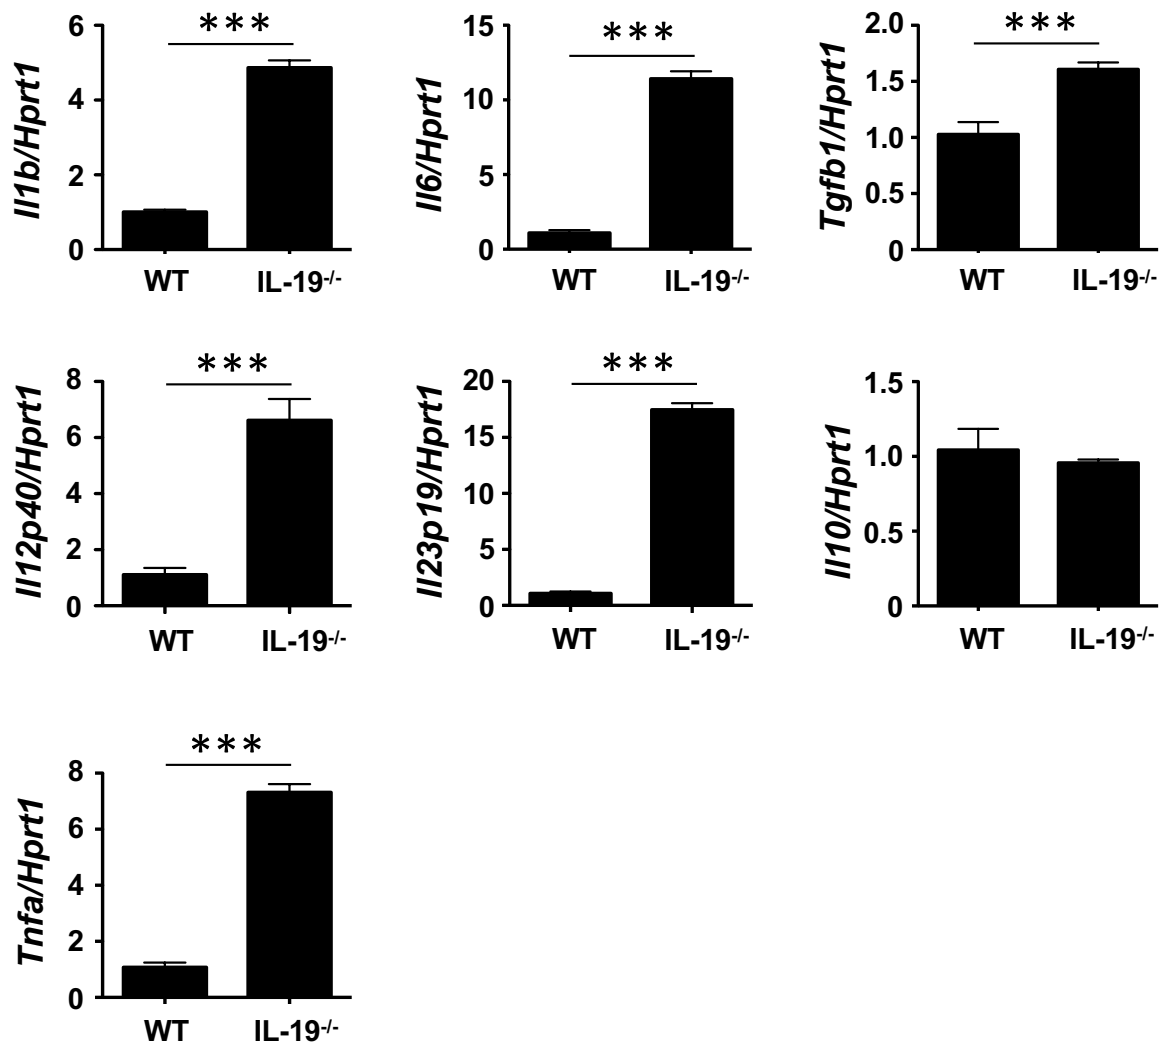

A

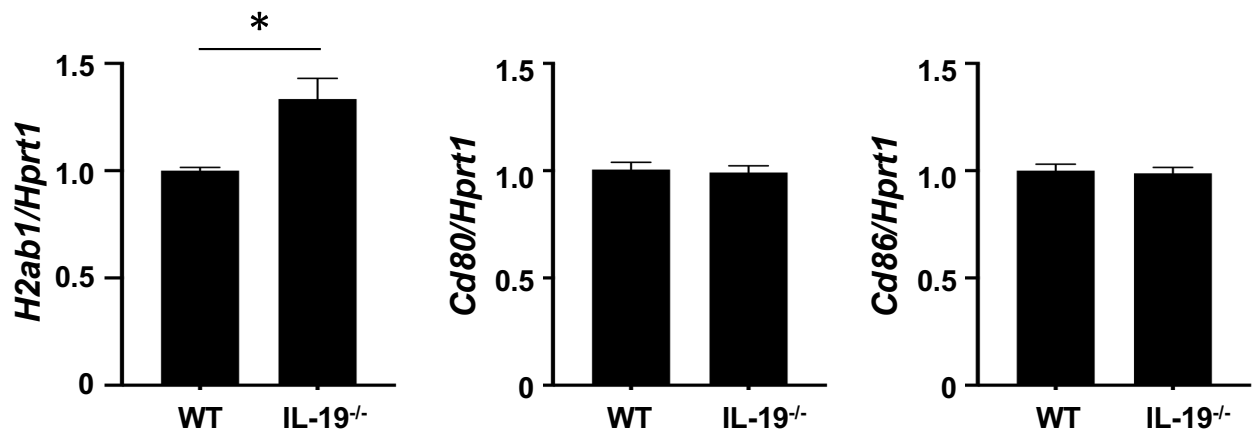

B

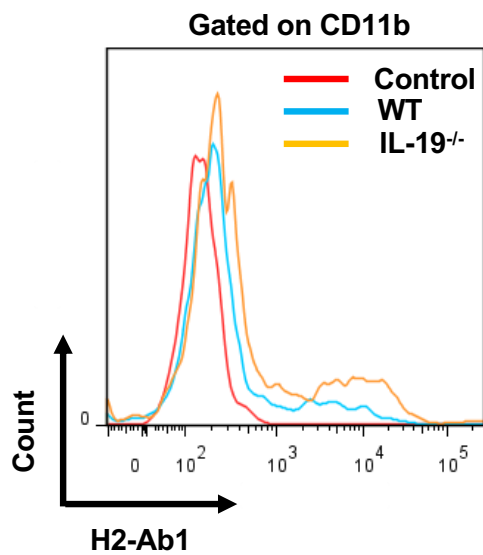

A

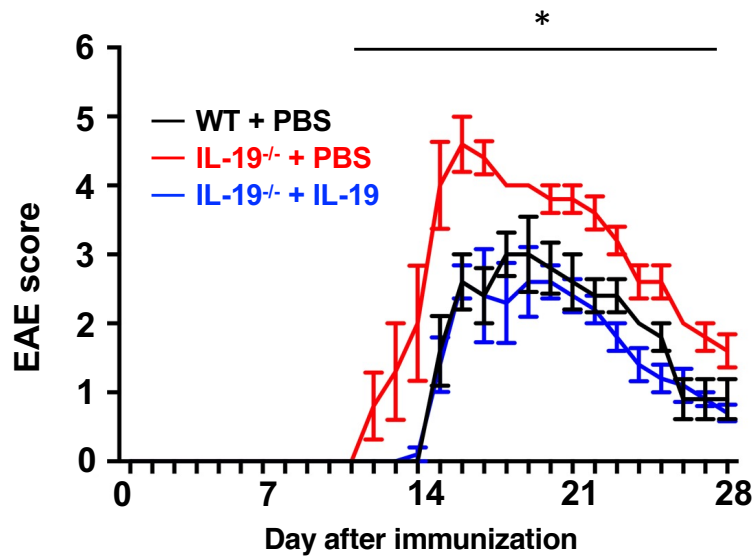

B

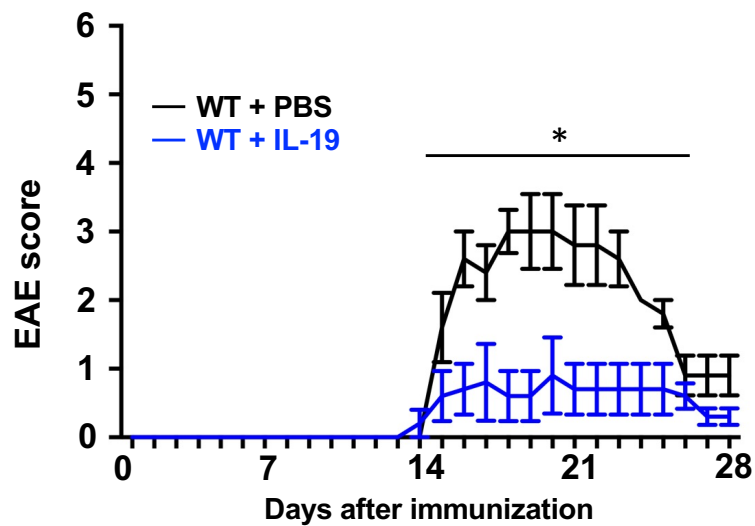

Source: https://www.biorxiv.org/content/10.1101/2020.07.15.204826v2.full.pdf
